# Supplementary material for: Synthesis and reactivity of a tris(carbene) zinc chloride complex
Source: Royal Society of Chemistry journal article supplement (doi:10.1039/d2dt02809c), 2022-01-01
Supplement: d2dt02809c1.pdf [file d2dt02809c1.pdf]

Supporting Information for:

**Synthesis and Reactivity of a tris(carbene) Zinc Chloride Complex**

Tobias J. Sherbow,<sup>1</sup> Keyan Li,<sup>1</sup> Lev N. Zakharov,<sup>1</sup> and Michael D. Pluth<sup>1,\*</sup>

*<sup>1</sup> Department of Chemistry and Biochemistry, Materials Science Institute, Knight Campus for Accelerating Scientific Impact, and Institute of Molecular Biology, University of Oregon, Eugene, Oregon, 97403-1253, United States.*

*pluth@uoregon.edu*

| <b>Table of Contents</b>                     | <b>Page</b> |
|----------------------------------------------|-------------|
| <b>1. X-Ray Crystallographic Data Tables</b> | <b>S2</b>   |
| <b>2. NMR Spectroscopic Data</b>             | <b>S3</b>   |
| <b>3. UV-vis Spectroscopic Data</b>          | <b>S7</b>   |

# 1. X-Ray Crystallographic Data Tables

**Table S1.**

|                                                | <b>PhB(<sup>t</sup>Bulm)<sub>3</sub>ZnCl</b>         | <b>PhB(<sup>t</sup>Bulm)<sub>3</sub>ZnBu</b>       | <b>PhB(<sup>t</sup>BulmH)(<sup>t</sup>Bulm)<sub>2</sub>ZnS<sub>4</sub></b>          |
|------------------------------------------------|------------------------------------------------------|----------------------------------------------------|-------------------------------------------------------------------------------------|
| formula                                        | C <sub>27</sub> H <sub>38</sub> BCIN <sub>6</sub> Zn | C <sub>31</sub> H <sub>47</sub> BN <sub>6</sub> Zn | C <sub>32</sub> H <sub>49</sub> BN <sub>6</sub> O <sub>1.25</sub> S <sub>4</sub> Zn |
| fw                                             | 558.26                                               | 579.92                                             | 742.19                                                                              |
| temperature (K)                                | 173 (2)                                              | 213 (2)                                            | 173 (2)                                                                             |
| crystal syst                                   | Monoclinic                                           | Monoclinic                                         | Orthorhombic                                                                        |
| space group                                    | <i>P</i> 21/ <i>n</i>                                | <i>P</i> 21/ <i>c</i>                              | <i>P</i> <i>bca</i>                                                                 |
| <i>a</i> (Å)                                   | 9.6756(3)                                            | 10.6870(9)                                         | 18.5324(14)                                                                         |
| <i>b</i> (Å)                                   | 17.8862(5)                                           | 16.4527(14)                                        | 19.6563(15)                                                                         |
| <i>c</i> (Å)                                   | 16.4972(5)                                           | 18.4919(15)                                        | 41.276(3)                                                                           |
| $\alpha$ (deg)                                 | 90                                                   | 90                                                 | 90                                                                                  |
| $\beta$ (deg)                                  | 92.369(2)                                            | 105.538(4)                                         | 90                                                                                  |
| $\gamma$ (deg)                                 | 90                                                   | 90                                                 | 90                                                                                  |
| <i>V</i> (Å <sup>3</sup> )                     | 2852.56(15)                                          | 3132.6(5)                                          | 15035.8(19)                                                                         |
| <i>Z</i>                                       | 4                                                    | 4                                                  | 16                                                                                  |
| $\rho$ (mm <sup>-1</sup> )                     | 1.300                                                | 1.230                                              | 1.311                                                                               |
| F(000)                                         | 1176                                                 | 1240                                               | 6272                                                                                |
| cryst size (mm <sup>3</sup> )                  | 0.22 × 0.16 × 0.12                                   | 0.15 × 0.14 × 0.07                                 | 0.02 × 0.01 × 0.01                                                                  |
| $\theta$ range (deg)                           | 3.646 – 66.504                                       | 3.66– 66.67                                        | 2.141 – 49.811                                                                      |
| completeness to $\theta$ (%)                   | 96.1                                                 | 99.2                                               | 99.8                                                                                |
| total reflns                                   | 12099                                                | 21092                                              | 42179                                                                               |
| indep reflns                                   | 4843                                                 | 5512                                               | 7645                                                                                |
| restraints / param                             | 0 / 325                                              | 9 / 365                                            | 0 / 740                                                                             |
| max, min transmn                               | 0.774, 0.637                                         | 0.683, 0.753                                       | 0.648, 0.750                                                                        |
| R1 (wR2) [ <i>I</i> > 2 $\sigma$ ( <i>I</i> )] | 0.0362 (0.1006)                                      | 0.0363 (0.0980)                                    | 0.0759 (0.1827)                                                                     |
| R1 (wR2)                                       | 0.0429 (0.1059)                                      | 0.0404 (0.1014)                                    | 0.1304 (0.2145)                                                                     |
| GOF ( <i>F</i> <sup>2</sup> )                  | 0.908                                                | 1.048                                              | 1.023                                                                               |
| max, min peaks (e Å <sup>-3</sup> )            | 0.335, -0.285                                        | 1.204, -0.437                                      | 0.560, -0.469                                                                       |

## 2. NMR Spectroscopic Data

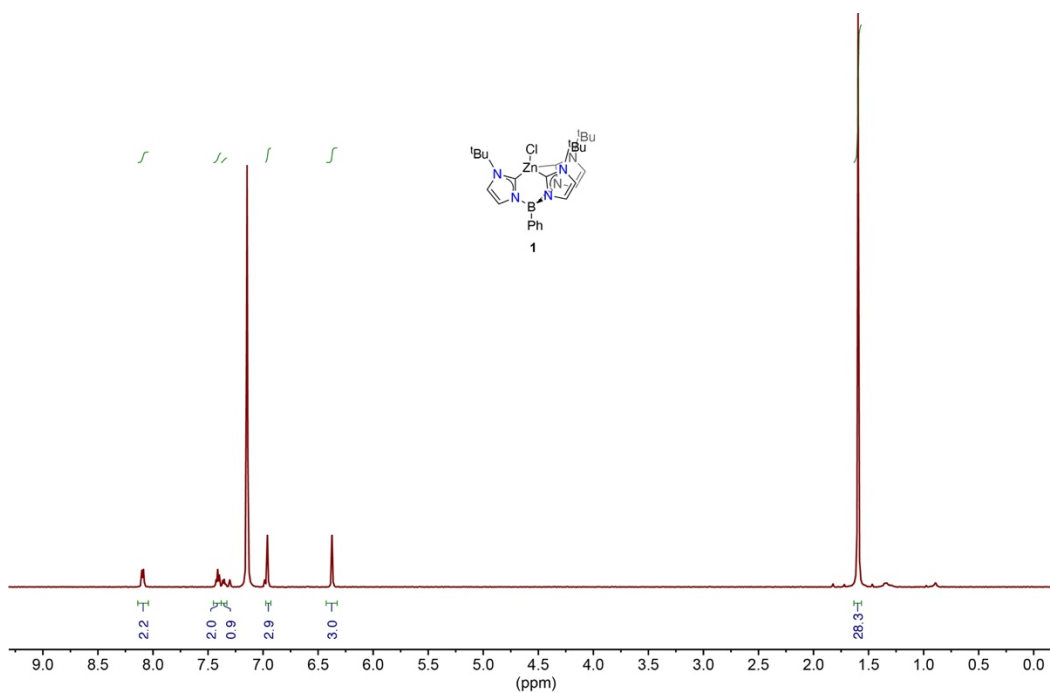

**Figure S1.**  $^1\text{H}$  NMR spectrum of  $\text{PhB}(\text{tBuIm})_3\text{ZnCl}$  (**1**) in  $\text{C}_6\text{D}_6$ .

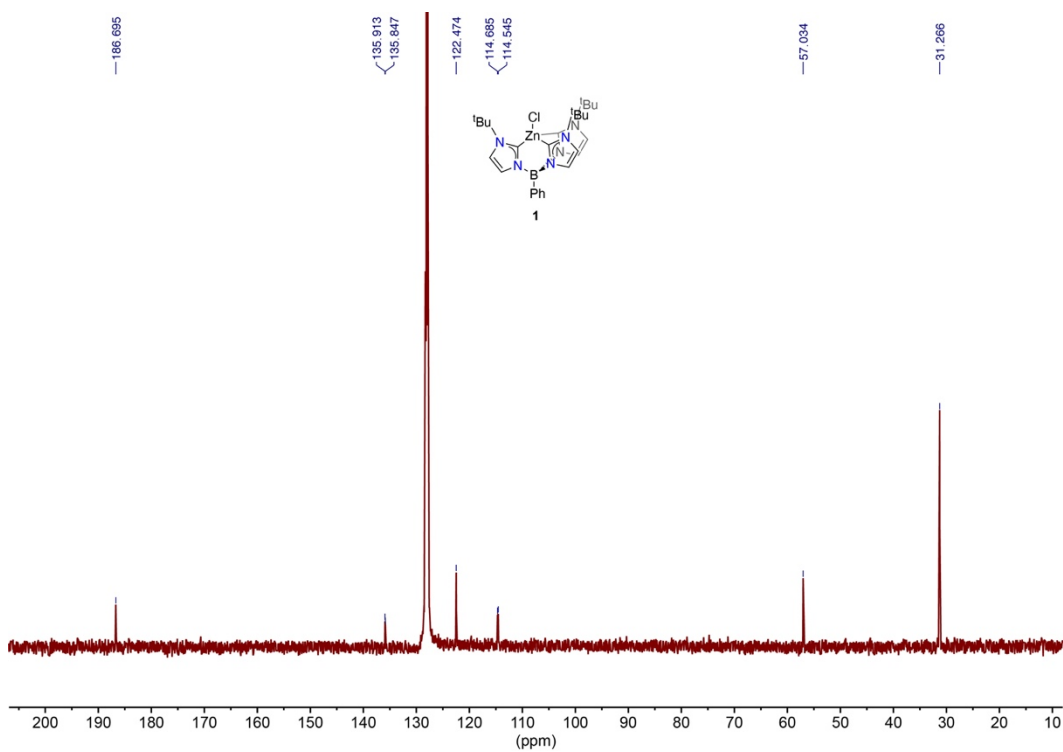

**Figure S2.**  $^{13}\text{C}\{^1\text{H}\}$  NMR spectrum of  $\text{PhB}(\text{tBuIm})_3\text{ZnCl}$  (**1**) in  $\text{C}_6\text{D}_6$ .

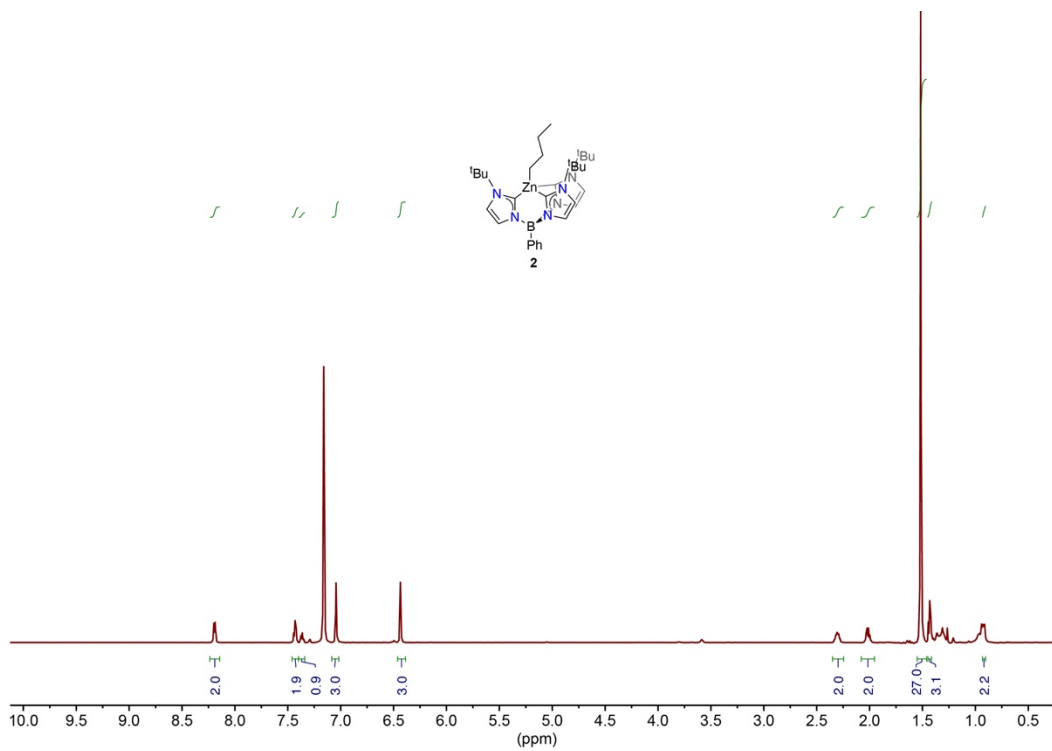

**Figure S3.** <sup>1</sup>H NMR spectrum of PhB(<sup>t</sup>BuIm)<sub>3</sub>ZnBu (**2**) in C<sub>6</sub>D<sub>6</sub>.

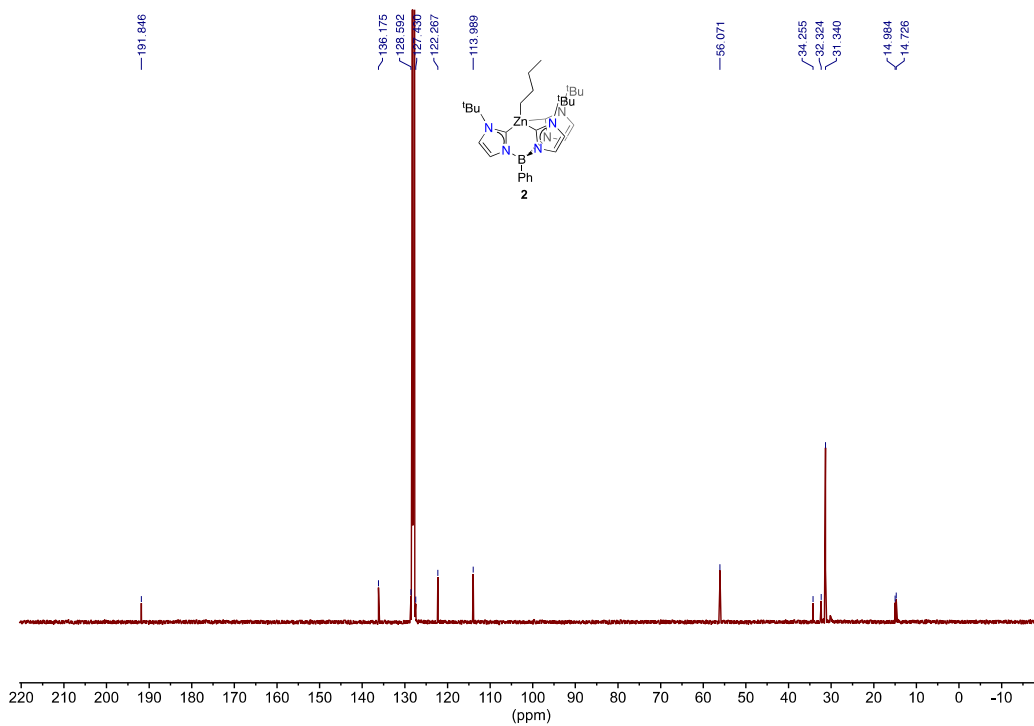

**Figure S4.** <sup>13</sup>C{<sup>1</sup>H} NMR spectrum of PhB(<sup>t</sup>BuIm)<sub>3</sub>ZnBu (**2**) in C<sub>6</sub>D<sub>6</sub>.

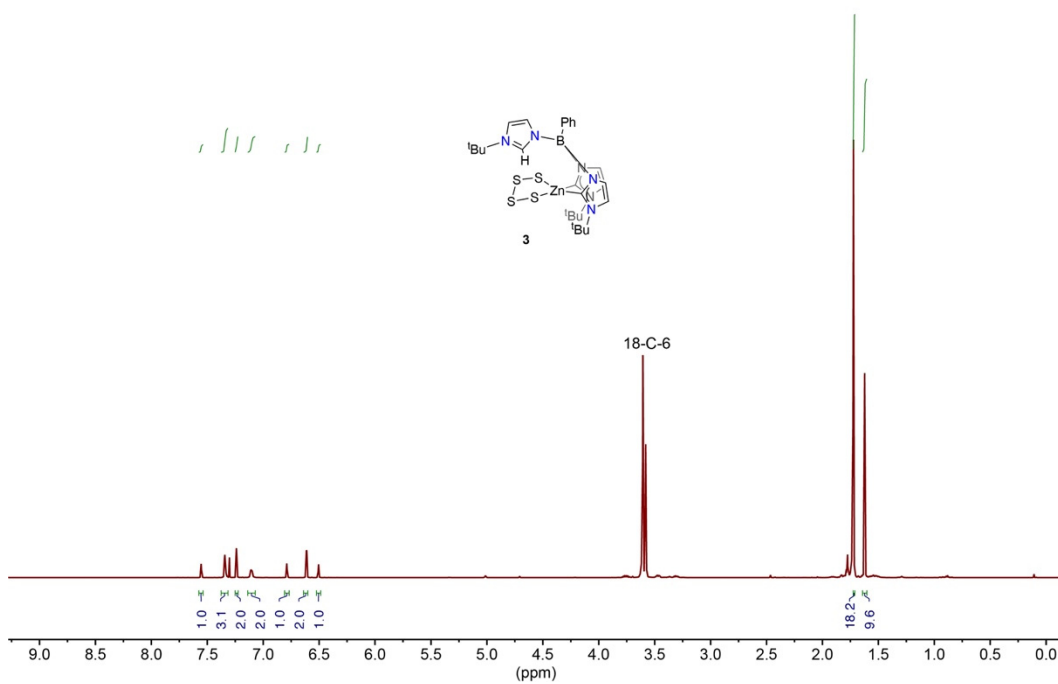

**Figure S5.**  $^1\text{H}$  NMR spectrum of  $\text{PhB}(\text{tBuImH})(\text{tBuIm})_2\text{ZnS}_4$  (**3**) in  $d_8$ -THF.

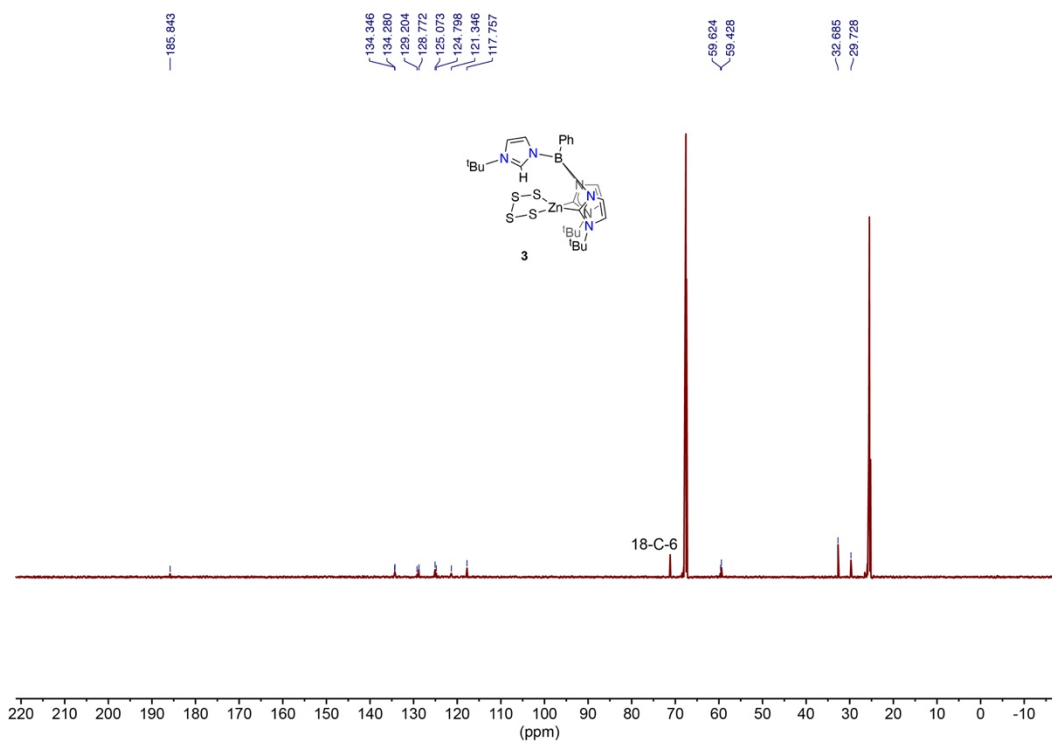

**Figure S6.**  $^{13}\text{C}\{^1\text{H}\}$  NMR spectrum of  $\text{PhB}(\text{tBuImH})(\text{tBuIm})_2\text{ZnS}_4$  (**3**) in  $d_8$ -THF.

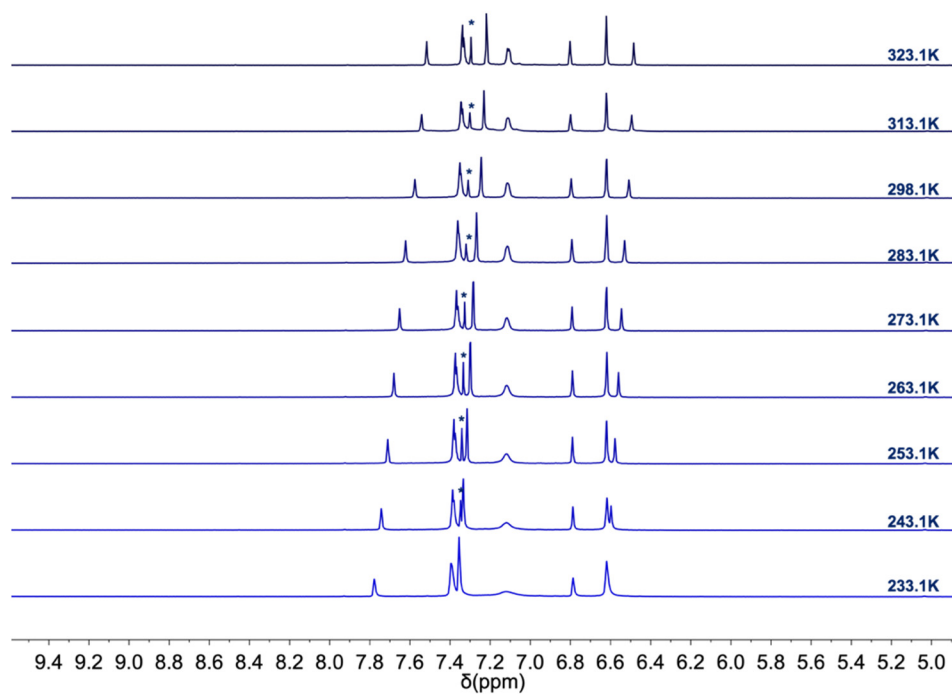

**Figure S7.** Variable temperature  $^1\text{H}$  NMR spectra of the aromatic region of  $\text{PhB}(\text{tBulmH})(\text{tBulm})_2\text{ZnS}_4$  (**3**) in  $\text{d}_8\text{-THF}$ . “\*” denotes residual  $\text{C}_6\text{H}_6$ .

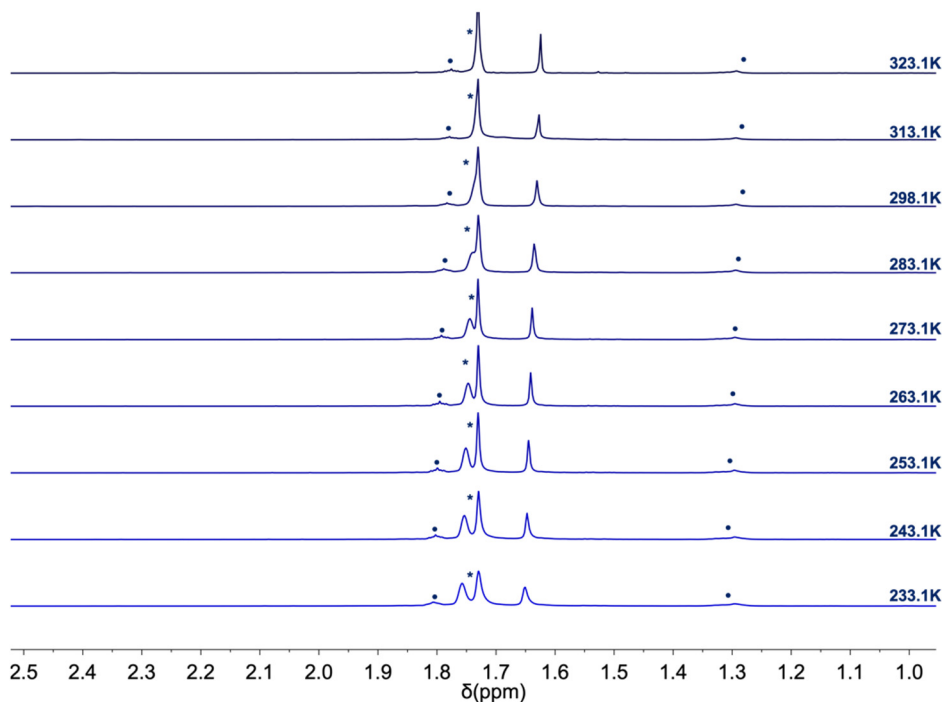

**Figure S8.** Variable temperature  $^1\text{H}$  NMR spectra of the aliphatic region for (**3**) in  $\text{d}_8\text{-THF}$ . “•” denotes solvent signal of  $\text{d}_8\text{-THF}$  and “\*” denotes residual hexanes.

### 3. UV-vis Spectroscopic Data

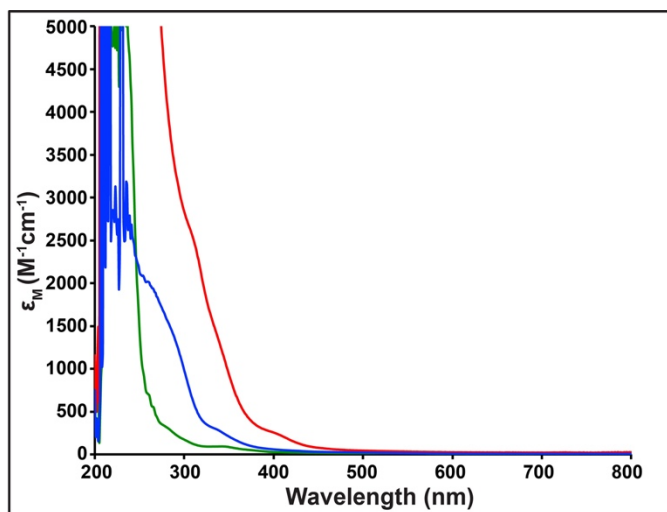

**Figure S9.** UV-vis spectra of complexes **1** (green), **2** (blue), **3** (red), acquired in THF at 298 K.
